# Supplementary material for: Comparison of Transcriptomic Analysis of the Conjunctiva in Glaucoma-Treated Eyes with Dry Eyes and Healthy Controls
Source: MDPI journal article supplement (doi:10.3390/biom14010030), 2023-12-25
Supplement: s1 [file s1]

# Supplementary Materials:

**Table S1** Frequency and combination of medications used in eyes included in RNA sequencing. PGA: prostaglandin analogues. BB: beta-blockers. CAIs: carbonic anhydrase inhibitors. AA: alpha agonists.

| PGA-BB-CAI-AA | Frequency | Percentage   |
|---------------|-----------|--------------|
| 1-1-0-0       | 9         | 27.3         |
| 0-1-1-0       | 5         | 15.2         |
| 1-1-1-0       | 5         | 15.2         |
| 0-0-0-1       | 3         | 9.1          |
| 0-1-0-1       | 3         | 9.1          |
| 0-1-0-0       | 2         | 6.1          |
| 0-1-1-1       | 2         | 6.1          |
| 1-1-1-1       | 2         | 6.1          |
| 1-0-0-0       | 1         | 3.0          |
| 1-1-0-1       | 1         | 3.0          |
| <b>Total</b>  | <b>33</b> | <b>100.0</b> |

**Table S2.** List of 60 genes altered in the conjunctiva of treated patients compared to healthy conjunctiva by RNA sequencing.

| ID gene            | Gene Name     | log Fold Change | p Value | GO Molecular Function                                        | GO Biological Process                                             |
|--------------------|---------------|-----------------|---------|--------------------------------------------------------------|-------------------------------------------------------------------|
| ENSG00000106278.11 | <i>PTPRZ1</i> | 1.893           | 0.002   | Transmembrane receptor protein tyrosine phosphatase activity | Regulation of oligodendrocyte progenitor proliferation            |
| ENSG00000114013.15 | <i>CD86</i>   | 1.770           | 0.001   | Signaling receptor binding and coreceptor activity           | Immune system                                                     |
| ENSG00000112799.8  | <i>LY86</i>   | 1.548           | 0.001   | Sensor component                                             | Immune system                                                     |
| ENSG00000095970.16 | <i>TREM2</i>  | 1.523           | 0.003   | Scaffold protein binding                                     | Amyloid-beta clearance and immune system                          |
| ENSG00000175857.8  | <i>GAPT</i>   | 1.484           | 0.005   | Scaffold protein binding                                     | Immune system                                                     |
| ENSG00000140678.16 | <i>ITGAX</i>  | 1.471           | 0.009   | Signaling receptor activity                                  | Cell adhesion and immune system                                   |
| ENSG00000043591.5  | <i>ADRB1</i>  | 1.446           | 0.004   | Nucleotide binding regulatory protein-coupled receptor       | Adrenergic receptor signaling pathway and response to cold, fear. |
| ENSG00000010671.15 | <i>BTB</i>    | 1.415           | 0.002   | Non-membrane spanning protein tyrosine kinase activity       | Immune system                                                     |
| ENSG00000136869.14 | <i>TLR4</i>   | 1.409           | 0.000   | Amyloid-beta binding and LPS sensor activity                 | Immune system                                                     |

|                    |         |        |       |                                                         |                                                                               |
|--------------------|---------|--------|-------|---------------------------------------------------------|-------------------------------------------------------------------------------|
| ENSG00000186818.12 | LILRB4  | 1.336  | 0.001 | Antigen binding and signaling receptor activity         | Immune system                                                                 |
| ENSG00000169896.17 | ITGAM   | 1.326  | 0.005 | Cargo receptor activity                                 | Cell adhesion and immune system                                               |
| ENSG00000011600.11 | TYROBP  | 1.311  | 0.000 | Signaling receptor binding                              | Actin cytoskeleton organization and immune system                             |
| ENSG00000158869.10 | FCER1G  | 1.196  | 0.010 | IgE receptor activity                                   | Immune system and mast cell activation                                        |
| ENSG00000000938.12 | FGR     | 1.195  | 0.006 | Fc-γ receptor I complex binding                         | Immune system                                                                 |
| ENSG00000101336.13 | HCK     | 1.187  | 0.004 | Tyrosine kinase activity and signaling receptor binding | Cell adhesion and immune system                                               |
| ENSG00000104903.4  | LYL1    | 1.175  | 0.000 | Transcription factor activity                           | B cell differentiation and blood vessel maturation                            |
| ENSG00000157017.15 | GHRL    | 1.170  | 0.001 | Hormone activity                                        | Adult feeding behavior                                                        |
| ENSG00000153071.14 | DAB2    | 1.167  | 0.008 | GTPase activator activity                               | Cellular response to LPS, TNF and cellular response to unfolded protein       |
| ENSG00000175899.14 | A2M     | 1.166  | 0.007 | Endopeptidase inhibitor activity                        | Extracellular matrix disassembly                                              |
| ENSG00000213203.2  | GIMAP1  | 1.163  | 0.000 | GTP binding activity                                    | UK                                                                            |
| ENSG00000038945.14 | MSR1    | 1.159  | 0.008 | Cargo receptor activity                                 | Phagocytosis, engulfment                                                      |
| ENSG00000134516.16 | DOCK2   | 1.139  | 0.002 | T-cell receptor binding                                 | Actin remodelling and phagocytosis                                            |
| ENSG00000137491.14 | SLCO2B1 | 1.134  | 0.006 | Organic anion transmembrane transporter activity        | Solute transport membranes                                                    |
| ENSG00000203747.10 | FCGR3A  | 1.092  | 0.007 | IgG binding                                             | Immune system                                                                 |
| ENSG00000100097.11 | LGALS1  | 1.091  | 0.000 | Carbohydrate binding                                    | Apoptotic process and cellular response to glucose stimulus                   |
| ENSG00000204482.10 | LST1    | 1.086  | 0.002 | Leukocyte specific transcript 1                         | Cell morphogenesis and immune system                                          |
| ENSG00000155926.13 | SLA     | 0.968  | 0.003 | Signaling receptor binding                              | Cell differentiation and regulation of cell population proliferation          |
| ENSG00000079215.13 | SLC1A3  | 0.955  | 0.003 | Glutamate binding                                       | Response to light stimulus and response to wounding                           |
| ENSG00000136286.15 | MYO1G   | 0.954  | 0.004 | Actin and calmodulin binding                            | Cell gliding and cell-substrate adhesion                                      |
| ENSG00000250312.7  | ZNF718  | 0.896  | 0.009 | DNA binding and metal ion binding                       | Regulation of transcription and DNA-templated                                 |
| ENSG00000264230.8  | ANXA8L1 | -1.153 | 0.009 | Calcium-dependent phospholipid binding                  | Endosome organization                                                         |
| ENSG00000156414.18 | TDRD9   | -1.159 | 0.003 | RNA helicase activity                                   | Cell differentiation and gene silencing                                       |
| ENSG00000135318.11 | NT5E    | -1.162 | 0.008 | Nucleotide binding                                      | Leukocyte cell-cell adhesion and negative regulation of inflammatory response |
| ENSG00000181449.3  | SOX2    | -1.226 | 0.004 | Transcription activator activity                        | Cell differentiation and cell fate commitment                                 |
| ENSG00000164627.17 | KIF6    | -1.266 | 0.002 | Microtubule binding                                     | Microtubule-based movement                                                    |
| ENSG00000132429.9  | POPDC3  | -1.272 | 0.004 | cAMP binding                                            | Tissue development and differentiation                                        |
| ENSG00000128578.9  | STRIP2  | -1.289 | 0.000 | Striatin interacting protein                            | Cell migration and cytoskeleton organization                                  |
| ENSG00000118971.7  | CCND2   | -1.302 | 0.010 | Cyclin-dependent protein serine/threonine kinase        | Cell division                                                                 |

|                    |                 |        |       |                                                                         |                                                                                                 |
|--------------------|-----------------|--------|-------|-------------------------------------------------------------------------|-------------------------------------------------------------------------------------------------|
| ENSG00000141314.12 | <i>RHBDL3</i>   | -1.344 | 0.001 | Calcium ion binding and endopeptidase activity                          | UK                                                                                              |
| ENSG00000110975.8  | <i>SYT10</i>    | -1.373 | 0.009 | Clathrin binding                                                        | Exocytosis                                                                                      |
| ENSG00000164949.7  | <i>GEM</i>      | -1.446 | 0.006 | GTPase activity and calcium channel regulator activity                  | Immune system and mitotic cell cycle                                                            |
| ENSG00000203710.11 | <i>CR1</i>      | -1.452 | 0.001 | Complement component                                                    | Complement activation                                                                           |
| ENSG00000119508.17 | <i>NR4A3</i>    | -1.467 | 0.004 | Steroid hormone receptor activity                                       | Cellular response to catecholamine and corticotropin-releasing hormone stimulus                 |
| ENSG00000135046.13 | <i>ANXA1</i>    | -1.469 | 0.004 | Cadherin binding and single-stranded RNA binding                        | Immune system and inflammatory response                                                         |
| ENSG00000142149.8  | <i>HUNK</i>     | -1.469 | 0.002 | Protein serine/threonine kinase activity                                | Signal transduction                                                                             |
| ENSG00000128422.16 | <i>KRT17</i>    | -1.469 | 0.006 | Structural constituent of cytoskeleton and MHC class II protein binding | Cornification and epidermis development                                                         |
| ENSG00000137440.4  | <i>FGFBP1</i>   | -1.480 | 0.004 | Fibroblast growth factor binding                                        | Regulation of fibroblast growth factor receptor signaling pathway                               |
| ENSG00000164687.10 | <i>FABP5</i>    | -1.494 | 0.001 | Lipid binding and retinoic acid binding                                 | Epidermis development                                                                           |
| ENSG00000135919.12 | <i>SERPINE2</i> | -1.504 | 0.006 | Signaling receptor binding                                              | Secretion by cell and sensory perception                                                        |
| ENSG00000182950.2  | <i>ODF3L1</i>   | -1.547 | 0.001 | UK                                                                      | UK                                                                                              |
| ENSG00000153234.13 | <i>NR4A2</i>    | -1.570 | 0.000 | Steroid hormone receptor activity                                       | Cellular response to catecholamine and corticotropin-releasing hormone stimulus                 |
| ENSG00000160223.17 | <i>ICOSLG</i>   | -1.604 | 0.002 | Signaling receptor binding                                              | Immune system                                                                                   |
| ENSG00000112276.13 | <i>BVES</i>     | -1.711 | 0.001 | Structural molecule activity                                            | Epithelial cell-cell adhesion                                                                   |
| ENSG00000163735.6  | <i>CXCL5</i>    | -1.733 | 0.004 | Chemokine activity                                                      | Immune system                                                                                   |
| ENSG00000100234.11 | <i>TIMP3</i>    | -1.871 | 0.001 | Metalloendopeptidase inhibitor activity                                 | Cellular response to organic substance and negative regulation of metalloendopeptidase activity |
| ENSG00000123243.14 | <i>ITIH5</i>    | -1.903 | 0.001 | Endopeptidase inhibitor activity                                        | Collagen-containing extracellular matrix                                                        |
| ENSG00000183833.16 | <i>MAATS1</i>   | -2.061 | 0.001 | Cilium movement                                                         | UK                                                                                              |
| Ensg00000275993.2  | <i>Sik1b</i>    | -2.070 | 0.000 | Serine/threonine kinase activity                                        | Intracellular signal transduction and protein phosphorylation                                   |
| Ensg00000136244.11 | <i>Il6</i>      | -2.103 | 0.003 | Cytokine binding                                                        | Immune system                                                                                   |
| Ensg00000183092.16 | <i>Begain</i>   | -2.204 | 0.000 | Kinase activity                                                         | Neuropathic pain and interaction at synapses                                                    |

**Table S3.** List of 60 genes most significantly altered in the conjunctiva of dry eye patients compared to healthy conjunctiva by RNA sequencing.

| ID gene            | Gene Name        | log Fold Change | p Value | GO Molecular Function                                            | GO Biological Process                                            |
|--------------------|------------------|-----------------|---------|------------------------------------------------------------------|------------------------------------------------------------------|
| ENSG00000090104.11 | <i>RGS1</i>      | 2.779           | 0.001   | GTPase activator activity and calmodulin binding                 | G protein-coupled receptor signaling pathway and immune response |
| ENSG00000147604.13 | <i>RPL7</i>      | 2.355           | 0.001   | Nucleic acid binding and protein homodimerization activity       | RNA catabolic process, nonsense-mediated decay                   |
| ENSG00000144199.11 | <i>FAHD2B</i>    | 2.259           | 0.000   | Hydrolase activity mitochondria                                  | ROS formation in respiratory chains                              |
| ENSG00000186847.5  | <i>KRT14</i>     | 2.174           | 0.007   | Structural constituent of cytoskeleton                           | Aging and cornification                                          |
| ENSG00000169413.2  | <i>RNASE6</i>    | 2.155           | 0.002   | Nucleic acid binding and ribonuclease activity                   | Innate immune response and RNA catabolic process                 |
| ENSG00000123560.13 | <i>PLP1</i>      | 2.125           | 0.005   | Major myelin protein                                             | Astrocyte development and inflammatory response                  |
| ENSG00000197410.13 | <i>DCHS2</i>     | 2.052           | 0.002   | Calcium ion binding                                              | Homophilic cell adhesion via plasma membrane adhesion molecules  |
| ENSG00000198712.1  | <i>MT-CO2</i>    | 1.993           | 0.006   | Copper ion binding and cytochrome-c oxidase activity             | Mitochondrial electron transport                                 |
| ENSG00000198189.10 | <i>HSD17B11</i>  | 1.962           | 0.001   | Steroid dehydrogenase activity                                   | Androgen catabolic process and estrogen biosynthetic process     |
| ENSG00000198727.2  | <i>MT-CYB</i>    | 1.848           | 0.007   | Metal ion binding and cytochrome-c oxidase activity              | Mitochondrial electron transport and response to stress and ion  |
| ENSG00000087076.8  | <i>HSD17B14</i>  | 1.831           | 0.009   | Steroid dehydrogenase activity                                   | Androgen catabolic process and estrogen biosynthetic process     |
| ENSG00000136160.15 | <i>EDNRB</i>     | 1.786           | 0.009   | Endothelin receptor activity                                     | Aging, proliferation and pain reception                          |
| ENSG00000150594.6  | <i>ADRA2A</i>    | 1.753           | 0.005   | Adrenergic receptor activity                                     | Proliferation and wound healing                                  |
| ENSG00000158869.10 | <i>FCER1G</i>    | 1.698           | 0.001   | IgE receptor activity                                            | Immune system and mast cell activation                           |
| ENSG00000269028.3  | <i>MTRNR2L12</i> | 1.667           | 0.002   | Receptor antagonist activity                                     | Negative regulation of execution phase of apoptosis              |
| ENSG00000113140.10 | <i>SPARC</i>     | 1.551           | 0.009   | Extracellular matrix binding                                     | Proliferation, migration, and cell differentiation               |
| ENSG00000131153.8  | <i>GIN52</i>     | 1.529           | 0.000   | DNA duplex unwinding                                             | DNA replication                                                  |
| ENSG00000091136.13 | <i>LAMB1</i>     | 1.527           | 0.004   | Extracellular matrix structural constituent and integrin binding | Cell adhesion and proliferation                                  |
| ENSG00000165568.17 | <i>AKR1E2</i>    | 1.505           | 0.006   | Oxidoreductase activity                                          | Oxidation-reduction process                                      |
| ENSG00000089685.14 | <i>BIRC5</i>     | 1.499           | 0.005   | Chaperone binding                                                | Cell proliferation and preventing apoptosis                      |
| ENSG00000276600.4  | <i>RAB7B</i>     | 1.496           | 0.004   | GTPase activity                                                  | inflammation and vesicle trafficking                             |
| ENSG00000115041.12 | <i>KCNIP3</i>    | 1.491           | 0.003   | Calcium ion binding                                              | Intracellular protein transport and apoptosis                    |
| ENSG00000124664.10 | <i>SPDEF</i>     | 1.464           | 0.008   | DNA-binding transcription factor activity                        | Goblet cells differentiation                                     |
| ENSG00000011028.13 | <i>MRC2</i>      | 1.436           | 0.004   | Collagen binding and transmembrane signaling receptor activity   | Collagen catabolic process and endocytosis                       |
| ENSG00000176153.11 | <i>GPX2</i>      | 1.430           | 0.003   | Electron transfer activity                                       | Cellular response to oxidative stress                            |
| ENSG00000136522.13 | <i>MRPL47</i>    | 1.428           | 0.001   | Structural constituent of ribosome                               | Mitochondrial translation                                        |
| ENSG00000150201.14 | <i>FXYD4</i>     | 1.395           | 0.004   | ATPase binding                                                   | Ion channel regulator activity                                   |
| ENSG00000163453.11 | <i>IGFBP7</i>    | 1.360           | 0.005   | Insulin-like growth factor binding                               | Cell adhesion and response to retinoic acid                      |

|                    |          |        |       |                                                                                |                                                                                                    |
|--------------------|----------|--------|-------|--------------------------------------------------------------------------------|----------------------------------------------------------------------------------------------------|
| ENSG00000198677.11 | TTC37    | 1.320  | 0.006 | Catabolism of deadenylated mRNA                                                | RNA catabolic process                                                                              |
| ENSG00000135547.8  | HEY2     | 1.305  | 0.003 | DNA-binding transcription factor activity                                      | Embryonic development                                                                              |
| ENSG00000107201.9  | DDX58    | -0.748 | 0.008 | Double-stranded RNA binding and RNA helicase                                   | Innate immune response                                                                             |
| ENSG00000137492.7  | THAP12   | -0.758 | 0.000 | Transcription factor activity                                                  | Negative regulation of cell population proliferation                                               |
| ENSG00000155090.14 | KLF10    | -0.760 | 0.004 | Transcription factor activity                                                  | Negative regulation of cell population proliferation                                               |
| ENSG00000135049.15 | AGTPBP1  | -0.775 | 0.006 | Metalloprotease activity and tulin binding                                     | Eye photoreceptor cell differentiation and mitochondrion organization                              |
| ENSG00000135317.12 | SNX14    | -0.781 | 0.006 | Phosphatidylinositol-3,5-bisphosphate binding                                  | Autophagosome maturation                                                                           |
| ENSG00000152601.17 | MBNL1    | -0.786 | 0.001 | Double-stranded RNA binding                                                    | Myoblast differentiation and nervous system development                                            |
| ENSG00000154114.12 | TBCEL    | -0.788 | 0.008 | Alpha-tubulin binding                                                          | Microtubule cytoskeleton organization                                                              |
| ENSG00000114480.12 | GBE1     | -0.803 | 0.003 | Glucan branching enzyme activity                                               | Carbohydrate metabolic process                                                                     |
| ENSG00000165322.17 | ARHGAP12 | -0.807 | 0.001 | GTPase activator activity                                                      | Actin filament organization and morphogenesis of an epithelial sheet                               |
| ENSG00000196263.7  | ZNF471   | -0.826 | 0.010 | DNA binding and metal ion binding                                              | Regulation of transcription                                                                        |
| ENSG00000115339.13 | GALNT3   | -0.827 | 0.007 | Calcium ion binding and carbohydrate binding                                   | Carbohydrate metabolic process and fibroblast growth factor receptor signaling pathway             |
| ENSG00000140450.8  | ARRDC4   | -0.831 | 0.005 | Protein binding. bridging involved in substrate recognition for ubiquitination | Extracellular vesicle biogenesis and positive regulation of ubiquitin-protein transferase activity |
| ENSG00000119938.8  | PPP1R3C  | -0.845 | 0.008 | Glycogen binding                                                               | Glycogen biosynthetic process                                                                      |
| ENSG00000180530.10 | NRIP1    | -0.853 | 0.006 | Hormone receptor binding                                                       | Regulation of transcription                                                                        |
| ENSG00000150457.8  | LATS2    | -0.853 | 0.004 | ATP binding Source and metal ion binding                                       | Cell division and hippo pathway                                                                    |
| ENSG00000179941.7  | BBS10    | -0.885 | 0.006 | ATP binding and RNA polymerase II repressing transcription factor binding      | Photoreceptor cell maintenance and visual perception                                               |
| ENSG00000239305.6  | RNF103   | -0.898 | 0.004 | E3 ubiquitin-protein ligase                                                    | Central nervous system development                                                                 |
| ENSG00000096717.11 | SIRT1    | -0.901 | 0.009 | NAD-dependent histone deacetylase activity                                     | Angiogenesis and response to damage                                                                |
| ENSG00000261210.7  | CLEC19A  | -0.910 | 0.004 | Carbohydrate binding                                                           | UK                                                                                                 |
| ENSG00000196542.8  | SPTSSB   | -0.949 | 0.000 | Serine palmitoyltransferase                                                    | Lipid metabolic process                                                                            |
| ENSG00000185947.14 | ZNF267   | -0.956 | 0.006 | DNA-binding transcription factor activity                                      | UK                                                                                                 |
| ENSG00000105855.9  | ITGB8    | -0.965 | 0.010 | Extracellular matrix protein binding                                           | Cell adhesion and migration                                                                        |
| ENSG00000176208.8  | ATAD5    | -0.976 | 0.000 | ATP binding and DNA binding                                                    | Regulation of mitotic cell cycle phase transition                                                  |
| ENSG00000273604.1  | EPOP     | -1.177 | 0.001 | Chromatin binding                                                              | Regulation of transcription                                                                        |
| ENSG00000148516.21 | ZEB1     | -1.273 | 0.007 | DNA-binding transcription factor activity                                      | Embryonic camera-type eye morphogenesis                                                            |
| ENSG00000169282.17 | KCNAB1   | -1.342 | 0.005 | Voltage-gated ion channels subunit                                             | Oxidation-reduction process                                                                        |
| ENSG00000050344.8  | NFE2L3   | -1.409 | 0.005 | DNA-binding transcription factor activity                                      | Positive regulation of transcription                                                               |
| ENSG00000107249.22 | GLIS3    | -1.413 | 0.005 | DNA binding and metal ion binding                                              | Transcription factor involved in eye development                                                   |
| ENSG00000183092.16 | BEGAIN   | -1.720 | 0.004 | Kinase activity                                                                | Neuropathic pain and interaction at synapses                                                       |
| ENSG00000154548.8  | SRSF12   | -1.872 | 0.000 | Nucleic acid binding                                                           | Regulation of mRNA splicing                                                                        |

**Table S4.** List of 60 genes most significantly altered in the conjunctiva of dry eye patients compared to healthy conjunctiva by RNA sequencing.

| ID gene            | Gene Name       | Log FC | p Value | GO Molecular Function                                                | GO Biological Process                                                        |
|--------------------|-----------------|--------|---------|----------------------------------------------------------------------|------------------------------------------------------------------------------|
| ENSG00000187242.5  | <i>KRT12</i>    | 2.505  | 0.0078  | Structural molecule activity                                         | Cornification and keratinization                                             |
| ENSG00000154548.8  | <i>SRSF12</i>   | 1.866  | 0.0000  | Nucleic acid binding                                                 | Regulation of mRNA splicing                                                  |
| ENSG00000179636.14 | <i>TPPP2</i>    | 1.599  | 0.0050  | Tubulin binding                                                      | Cell differentiation                                                         |
| ENSG00000106278.11 | <i>PTPRZ1</i>   | 1.527  | 0.0072  | Transmembrane receptor protein tyrosine phosphatase activity         | Regulation of oligodendrocyte progenitor proliferation                       |
| ENSG00000043591.5  | <i>ADRB1</i>    | 1.435  | 0.0066  | Nucleotide binding regulatory protein-coupled receptor               | Adrenergic receptor signaling pathway and response to cold, fear.            |
| ENSG00000050344.8  | <i>NFE2L3</i>   | 1.400  | 0.0020  | DNA-binding transcription factor activity                            | Positive regulation of transcription                                         |
| ENSG00000238083.7  | <i>LRRC37A2</i> | 1.378  | 0.0059  | Leucine-rich repeat-containing protein                               | UK                                                                           |
| ENSG00000136867.10 | <i>SLC31A2</i>  | 1.371  | 0.0034  | Copper ion transmembrane transporter activity                        | Cellular copper ion homeostasis                                              |
| ENSG00000114346.13 | <i>ECT2</i>     | 1.312  | 0.0045  | GTPase activator activity                                            | Bicellular tight junction assembly and cell morphogenesis                    |
| ENSG00000105327.17 | <i>BBC3</i>     | 1.224  | 0.0002  | Cysteine-type endopeptidase activity involved in apoptotic process   | Cellular response to damage                                                  |
| ENSG00000058866.14 | <i>DGKG</i>     | 1.185  | 0.0069  | Diacylglycerol kinase activity Source: BHF-UCL                       | Glycerolipid metabolic process                                               |
| ENSG00000188051.6  | <i>TMEM221</i>  | 1.158  | 0.0024  | Non-membrane spanning protein tyrosine kinase activity               | Immune system                                                                |
| ENSG00000010671.15 | <i>BTK</i>      | 1.150  | 0.0093  | Transcription factor activity                                        | Cell differentiation                                                         |
| ENSG00000123095.5  | <i>BHLHE41</i>  | 1.145  | 0.0002  | Transcription factor activity                                        | Animal organ morphogenesis and animal organ morphogenesis                    |
| ENSG00000104154.6  | <i>SLC30A4</i>  | 1.136  | 0.0020  | Zinc ion transmembrane transporter activity                          | Zinc ion homeostasis and response to toxic substance                         |
| ENSG00000196542.8  | <i>SPTSSB</i>   | 1.132  | 0.0000  | Ceramide biosynthetic process serine C-palmitoyltransferase activity | Sphingolipid metabolism and in Lipid metabolism                              |
| ENSG00000164440.14 | <i>TXLNB</i>    | 1.104  | 0.0083  | Syntaxin binding                                                     | UK                                                                           |
| ENSG00000114805.17 | <i>PLCH1</i>    | 1.098  | 0.0009  | Calcium-dependent phospholipase C activity                           | Lipid catabolic process and release of calcium ion into cytosol              |
| ENSG00000241106.7  | <i>HLA-DOB</i>  | 1.091  | 0.0084  | MHC class II protein complex binding                                 | Immune system                                                                |
| ENSG00000183018.8  | <i>SPNS2</i>    | 1.034  | 0.0007  | Sphingolipid transporter activity                                    | Lipid transport, immune cells homeostasis and regulation of eye pigmentation |
| ENSG00000105855.9  | <i>ITGB8</i>    | 1.028  | 0.0018  | Extracellular matrix protein binding                                 | Cell adhesion and migration                                                  |
| ENSG00000074527.11 | <i>NTN4</i>     | 1.027  | 0.0060  | Laminin-1 binding                                                    | Substrate adhesion-dependent cell spreading and tissue development           |
| ENSG00000113328.18 | <i>CCNG1</i>    | 1.021  | 0.0089  | Cyclin-dependent protein serine/threonine kinase                     | Cell division                                                                |

|                    |                  |        |        |                                                                         |                                                                                   |
|--------------------|------------------|--------|--------|-------------------------------------------------------------------------|-----------------------------------------------------------------------------------|
| ENSG00000104043.14 | <i>ATP8B4</i>    | 0.999  | 0.0046 | ATPase-coupled intramembrane lipid transporter activity                 | Golgi organization and neutrophil degranulation                                   |
| ENSG00000239305.6  | <i>RNF103</i>    | 0.997  | 0.0004 | Ubiquitin protein ligase activity                                       | Endoplasmic reticulum mannose trimming and protein ubiquitination                 |
| ENSG00000273604.1  | <i>EPOP</i>      | 0.965  | 0.0030 | Chromatin binding                                                       | Regulation of transcription                                                       |
| ENSG00000137878.17 | <i>GCOM1</i>     | 0.950  | 0.0006 | Intracellular signal transduction                                       | UK                                                                                |
| ENSG00000115339.13 | <i>GALNT3</i>    | 0.869  | 0.0011 | Carbohydrate binding                                                    | Protein O-linked glycosylation via threonine                                      |
| ENSG00000145375.7  | <i>SPATA5</i>    | 0.867  | 0.0016 | ATPase activity                                                         | Cell differentiation                                                              |
| ENSG00000198157.10 | <i>HMG5</i>      | -1.629 | 0.0005 | Chromatin and RNA binding                                               | Chromatin organization                                                            |
| ENSG00000112769.18 | <i>LAMA4</i>     | -1.645 | 0.0024 | Extracellular matrix structural constituent                             | Cell adhesion and extracellular matrix organization                               |
| ENSG00000107165.12 | <i>TYRP1</i>     | -1.732 | 0.0040 | Oxidoreductase activity                                                 | Regulation of melanin biosynthetic process                                        |
| ENSG00000135919.12 | <i>SERPINE2</i>  | -1.746 | 0.0015 | Serine-type endopeptidase inhibitor activity                            | Innervation and secretion by cell                                                 |
| ENSG00000150201.14 | <i>FXD4</i>      | -1.756 | 0.0000 | ATPase binding and ion channel regulator activity                       | Ion transmembrane transport                                                       |
| ENSG00000206072.12 | <i>SERPINB11</i> | -1.773 | 0.0038 | Serine-type endopeptidase inhibitor activity                            | Negative regulation of endopeptidase activity                                     |
| ENSG00000228253.1  | <i>MT-ATP8</i>   | -1.818 | 0.0001 | Proton transmembrane transporter activity                               | Mitochondrial ATP synthesis coupled proton transport                              |
| ENSG00000197641.11 | <i>SERPINB13</i> | -1.819 | 0.0000 | Cysteine-type endopeptidase inhibitor activity                          | Negative regulation of keratinocyte apoptotic process                             |
| ENSG00000173114.12 | <i>LRRN3</i>     | -1.841 | 0.0009 | UK                                                                      | UK                                                                                |
| ENSG00000198739.10 | <i>LRRTM3</i>    | -1.844 | 0.0072 | Protein-protein interactions                                            | UK                                                                                |
| ENSG00000118402.5  | <i>ELOVL4</i>    | -1.862 | 0.0023 | Fatty acid elongase activity                                            | Fatty acid biosynthetic process                                                   |
| ENSG00000128422.16 | <i>KRT17</i>     | -1.874 | 0.0007 | Structural constituent of cytoskeleton and MHC class II protein binding | Cornification and epidermis development                                           |
| ENSG00000136522.13 | <i>MRPL47</i>    | -1.893 | 0.0000 | Structural constituent of ribosome                                      | Mitochondrial translation                                                         |
| ENSG00000206075.13 | <i>SERPINB5</i>  | -1.901 | 0.0000 | Serine-type endopeptidase inhibitor activity                            | Extracellular matrix organization and regulation of epithelial cell proliferation |
| ENSG00000210082.2  | <i>MT-RNR2</i>   | -1.945 | 0.0000 | Receptor antagonist activity and signaling receptor binding             | Apoptotic process and cellular iron ion homeostasis                               |
| ENSG00000145423.4  | <i>SFRP2</i>     | -1.941 | 0.0038 | Endopeptidase activator and fibronectin binding activity                | Apoptotic process and negative regulation of epithelial cell proliferation        |
| ENSG00000119508.17 | <i>NR4A3</i>     | -1.948 | 0.0001 | Transcription activator activity                                        | Cellular respiration and mast cell degranulation                                  |
| ENSG00000198189.10 | <i>HSD17B11</i>  | -2.038 | 0.0000 | Steroid dehydrogenase activity                                          | Steroid metabolic process                                                         |
| ENSG00000142149.8  | <i>HUNK</i>      | -2.080 | 0.0000 | Protein serine/threonine kinase activity                                | Signal transduction                                                               |
| ENSG00000138653.9  | <i>NDST4</i>     | -2.095 | 0.0012 | Heparan sulfate N-acetylglucosaminyltransferase activity                | Heparin biosynthetic process                                                      |

|                    |                    |        |        |                                                            |                                                                   |
|--------------------|--------------------|--------|--------|------------------------------------------------------------|-------------------------------------------------------------------|
| ENSG00000198712.1  | <i>MT-CO2</i>      | -2.116 | 0.0006 | Copper ion binding and cytochrome-C oxidase activity       | Mitochondrial electron transport                                  |
| ENSG00000136160.15 | <i>EDNRB</i>       | -2.117 | 0.0001 | Endothelin receptor activity                               | Aging, proliferation, and pain reception                          |
| ENSG00000198677.11 | <i>TTC37</i>       | -2.118 | 0.0000 | Catabolism of deadenylated mRNA                            | RNA catabolic process                                             |
| ENSG00000169429.10 | <i>CXCL8 (IL8)</i> | -2.257 | 0.0001 | Chemokine activity                                         | Immune response                                                   |
| ENSG00000137440.4  | <i>FGFBP1</i>      | -2.379 | 0.0000 | Fibroblast growth factor binding                           | Cell-cell signaling                                               |
| ENSG00000164687.10 | <i>FABP5</i>       | -2.563 | 0.0000 | Lipid binding and retinoic acid binding                    | Epidermis development                                             |
| ENSG00000135046.13 | <i>ANXA1</i>       | -2.799 | 0.0000 | Cadherin binding and single-stranded RNA binding           | Immune system and inflammatory response                           |
| ENSG00000198727.2  | <i>MT-CYB</i>      | -2.836 | 0.0000 | Metal ion binding and cytochrome-c oxidase activity        | Mitochondrial electron transporter and response to stress and ion |
| ENSG00000169413.2  | <i>RNASE6</i>      | -2.941 | 0.0000 | Nucleic acid binding and ribonuclease activity             | Innate immune response and RNA catabolic process                  |
| ENSG00000090104.11 | <i>RGS1</i>        | -2.996 | 0.0000 | GTPase activator activity and calmodulin binding           | G protein-coupled receptor signaling pathway and immune response  |
| ENSG00000147604.13 | <i>RPL7</i>        | -3.125 | 0.0000 | Nucleic acid binding and protein homodimerization activity | RNA catabolic process, nonsense-mediated decay                    |

Fig. S1A

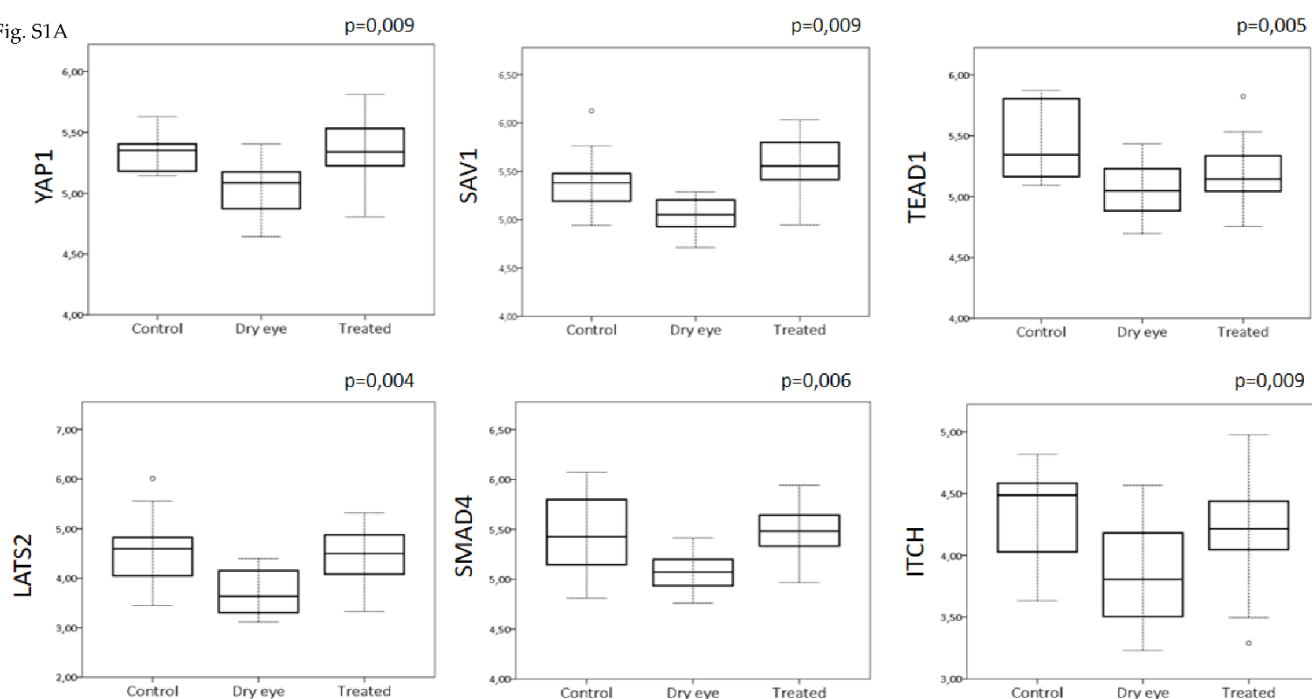



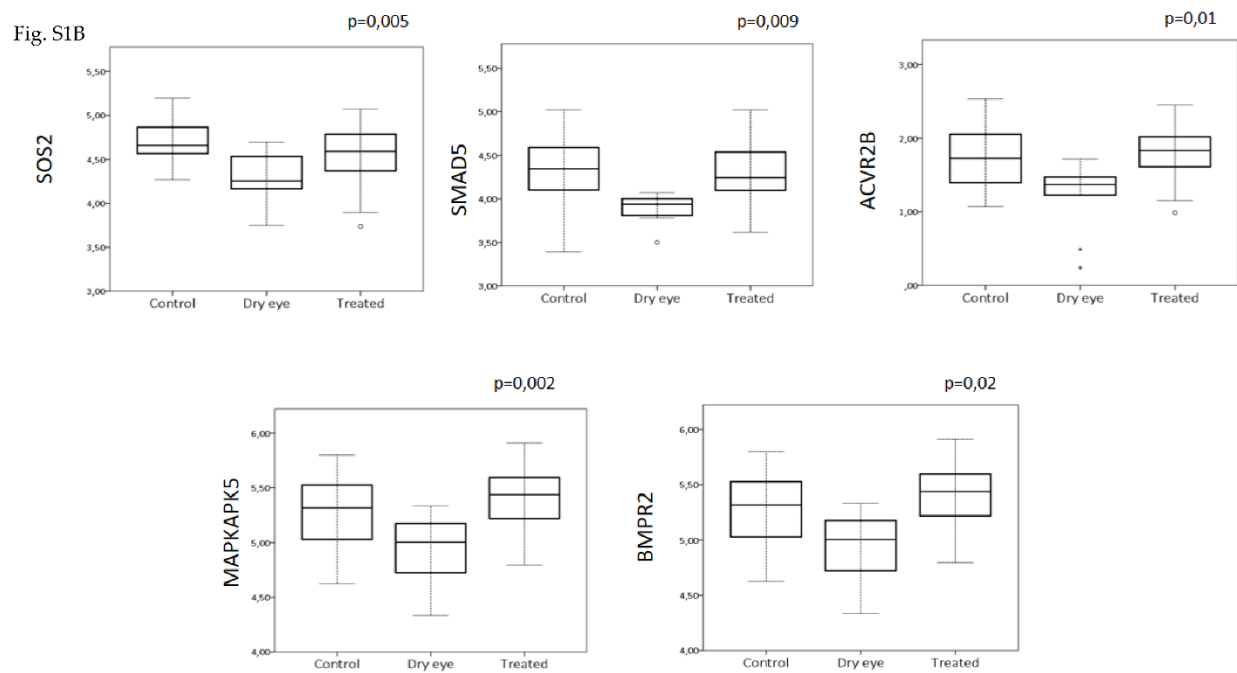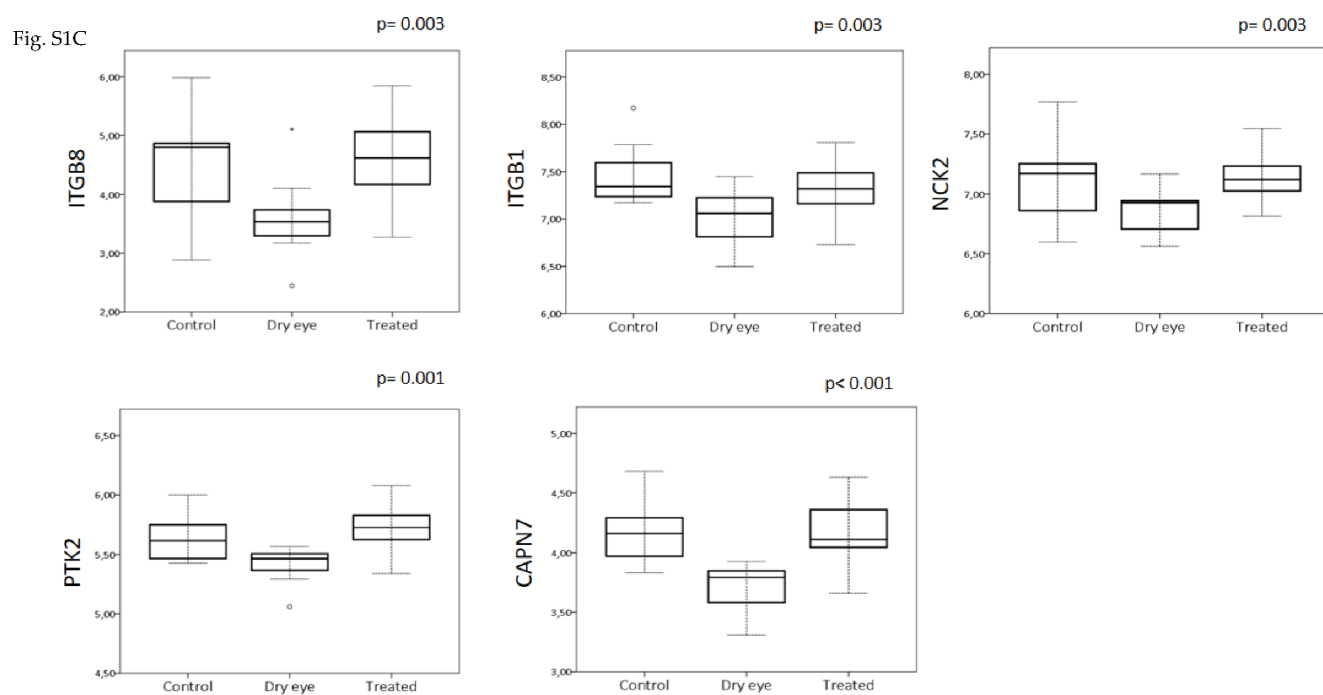

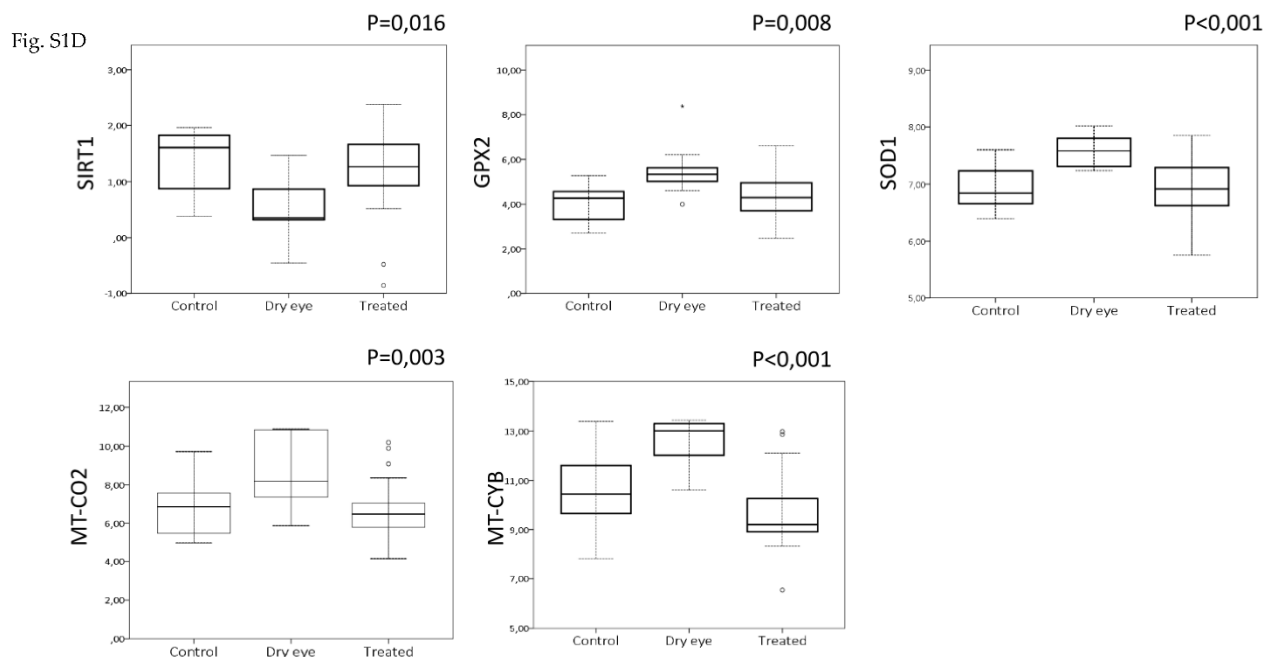

**Figure S1.** This figure shows gene expression levels dysregulated in dry eye syndrome patients related to the different pathways mentioned in the manuscript (immune system, cellular proliferation and differentiation, mitochondrial dysfunction, cellular movement and integrity and wound healing). A, Hippo signaling pathway-related gene expression. B, The TGF- $\beta$  signaling pathway-related gene expression. C, Gene expression related to the integrin signaling pathway. D, Gene expression regulating mitochondrial metabolism and redox equilibrium. These genes were obtained in the RNA sequencing.

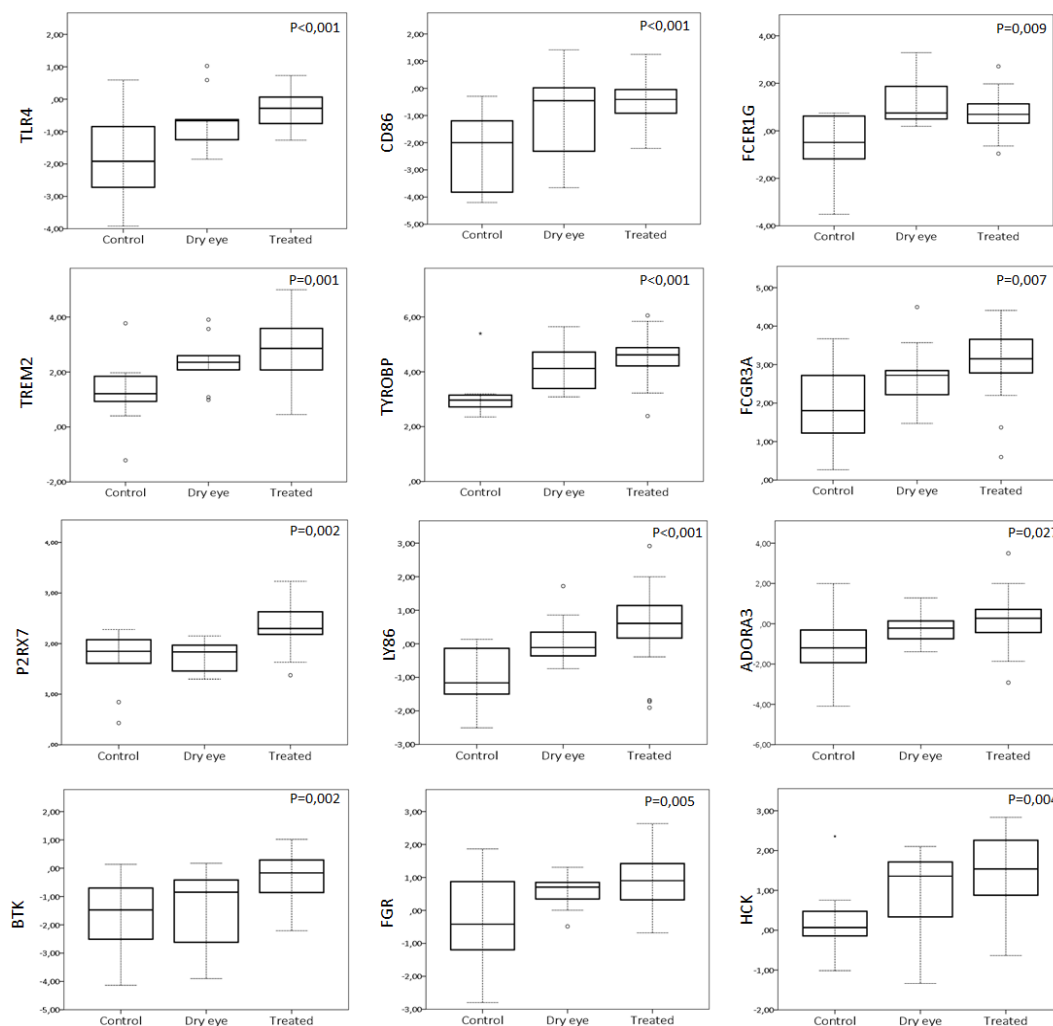

**Figure S2.** This figure shows gene expression levels dysregulated in glaucoma treated patients related to the different pathways mentioned in the manuscript (host defense and immune system, cellular proliferation and differentiation). These genes were obtained in the RNA sequencing.

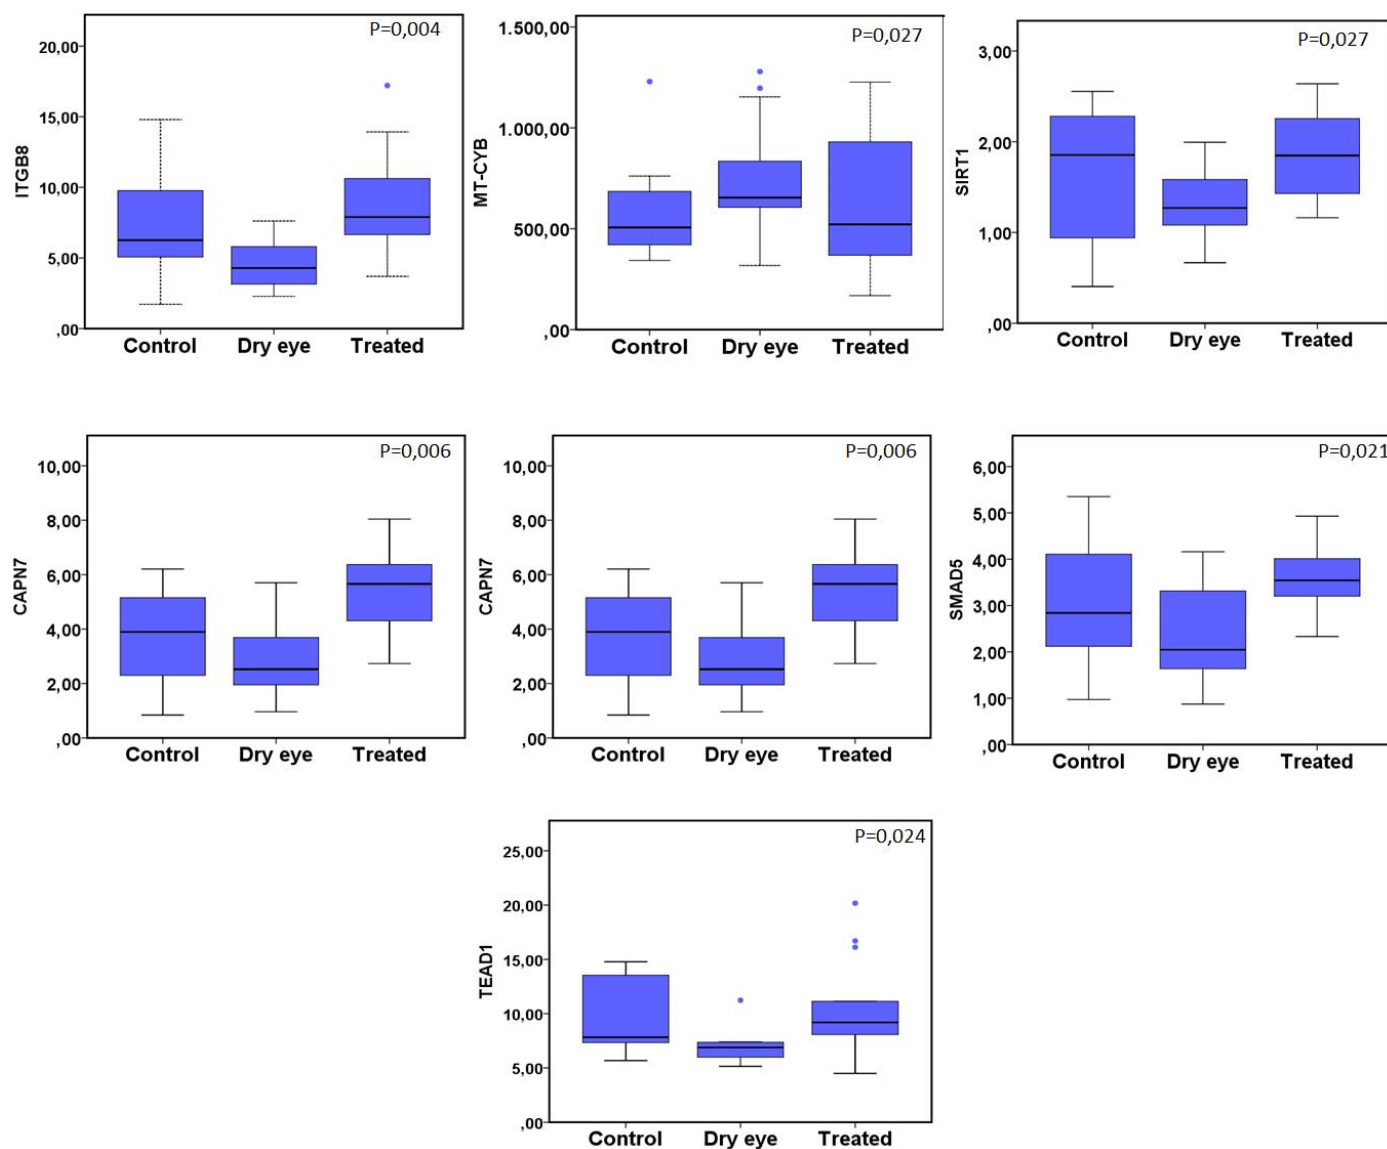

Figure S3. Validation of the gene expression in CIC samples from the dry eye syndrome patient group. 30 CIC samples out of 140 total CIC were selected for RNA validation.

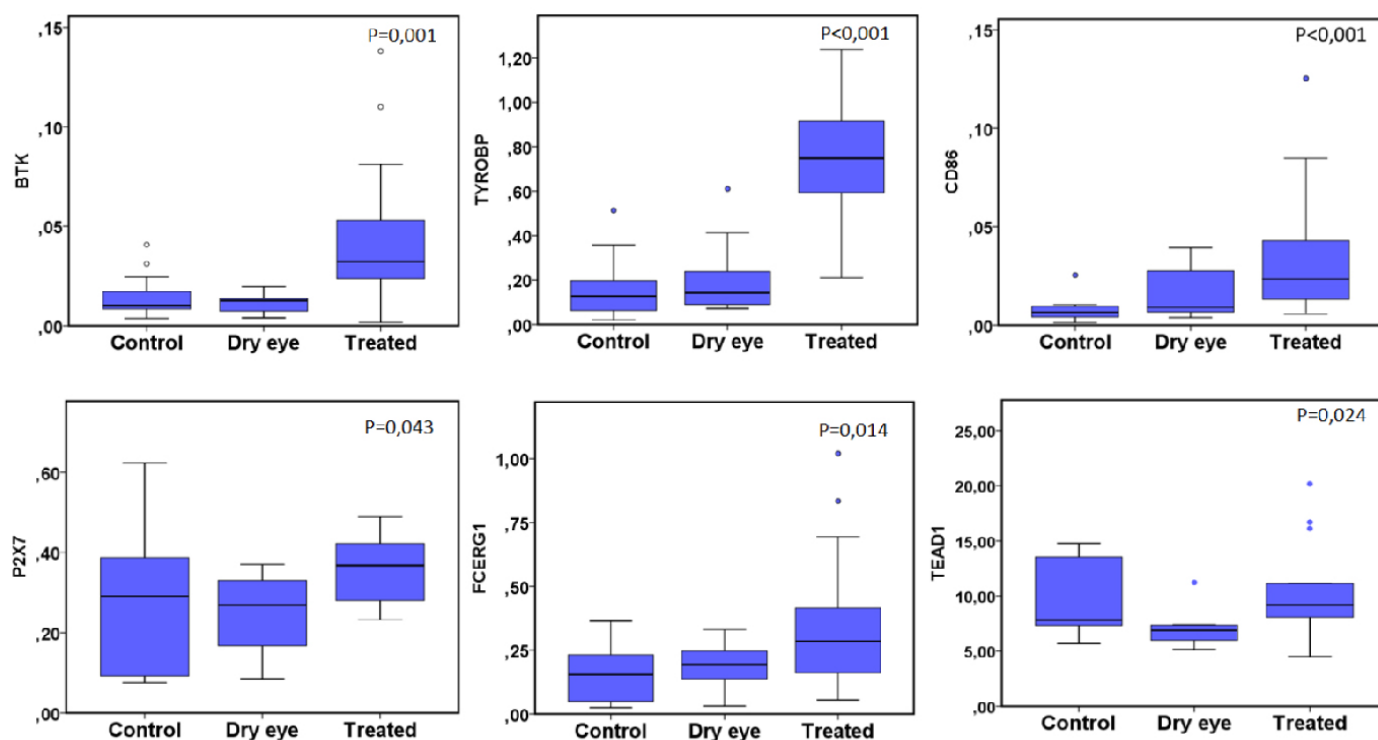

Figure S4. Validation of the gene expression in CIC samples from the treated glaucoma patient group. 30 CIC samples out of 140 total CIC were selected for RNA validation.
